# Supplementary material for: Three-dimensional protein assemblies directed by orthogonal non-covalent interactions
Source: Royal Society of Chemistry journal article supplement (doi:10.1039/c6cc04250c), 2016-01-01
Supplement: c6cc04250c1.pdf [file c6cc04250c1.pdf]

*Supporting Information*

*of*

**Three-dimensional protein assembly directed by  
orthogonal non-covalent interactions**

*Guang Yang<sup>a</sup>, Zdravko Kochovski<sup>b,c</sup>, Zhongwei Ji<sup>a</sup>, Yan Lu<sup>b</sup>, Guosong Chen<sup>\*a</sup>, Ming  
Jiang<sup>a</sup>*

<sup>a</sup>The State Key Laboratory of Molecular Engineering of Polymers and Department of Macromolecular Science, Fudan University, Shanghai, 200433 China.

<sup>b</sup>Soft Matter and Functional Materials, Helmholtz-Zentrum Berlin für Materialien und Energie, 14109 Berlin, Germany

<sup>c</sup>TEM Group, Institute of Physics, Humboldt-Universität zu Berlin, 12489 Berlin, Germany

**Sample preparation.** The small molecules were synthesized and characterized as described in supporting information (Scheme S1 and Figure S10-16). ConA protein was purchased from Sigma-Aldrich. All chemicals and proteins are used as received. The buffer solution was prepared with HEPES {4-(2-hydroxyethyl)-1-piperazineethanesulfonic acid} containing 20 mM HEPES, 5 mM  $\text{CaCl}_2$ , 5 mM  $\text{MnCl}_2$  and 40 mM NaCl.

**Characterization.** Nuclear magnetic resonance (NMR) was taken by AVANCE III HD 400 MHz of Bruker BioSpin International. UV-vis absorption spectra were recorded by Shimadzu UV-2550 spectrophotometer. Isothermal titration calorimetry (ITC) experiments were conducted on a MicroCal VP-ITC system at  $20.00 \pm 0.01^\circ\text{C}$ . Transmission electron microscopy (TEM) was performed on a JEOL JEM-2100 at 200 kv and by Tecnai G2 20 TWIN at 200 kv. The samples were prepared by dropping sample onto a copper grid and then blotting the excess solvent. Then the samples were subsequently stained with a 1 wt% uranyl acetate. Dynamic light scattering (DLS) was taken by Malvern Nano S instrument (Malvern, UK).

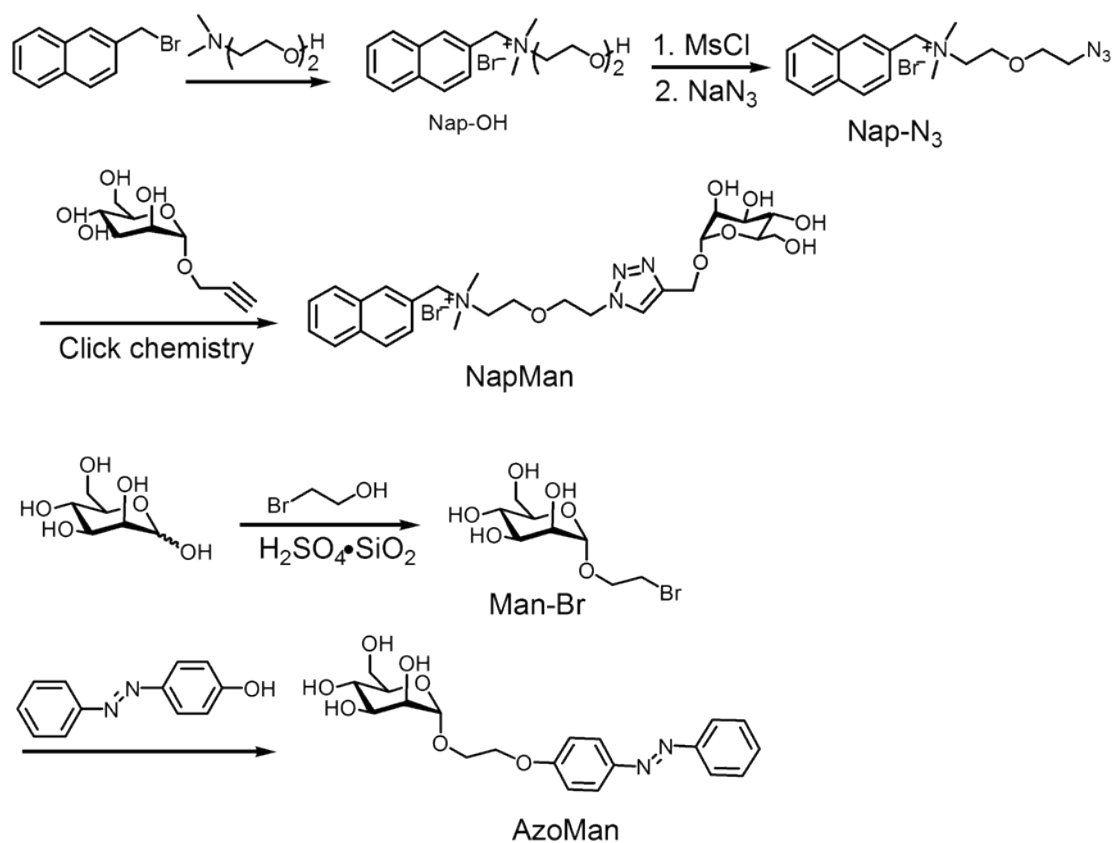

Scheme S1. Synthetic procedures of **NapMan** and **AzoMan** used in this paper.

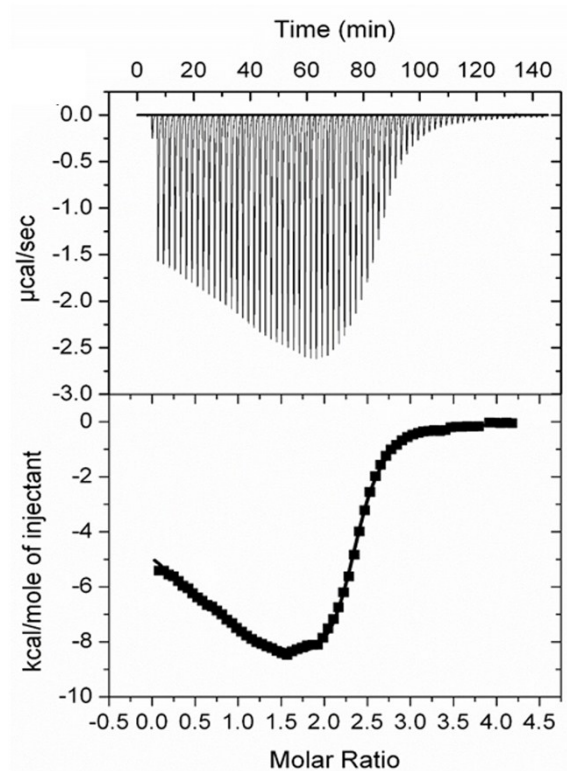

Figure S1. ITC results of raw and integrated data for titration of CB[8] (0.1 mM) to **NapMan** (2.0 mM) in aqueous solution at 20°C.

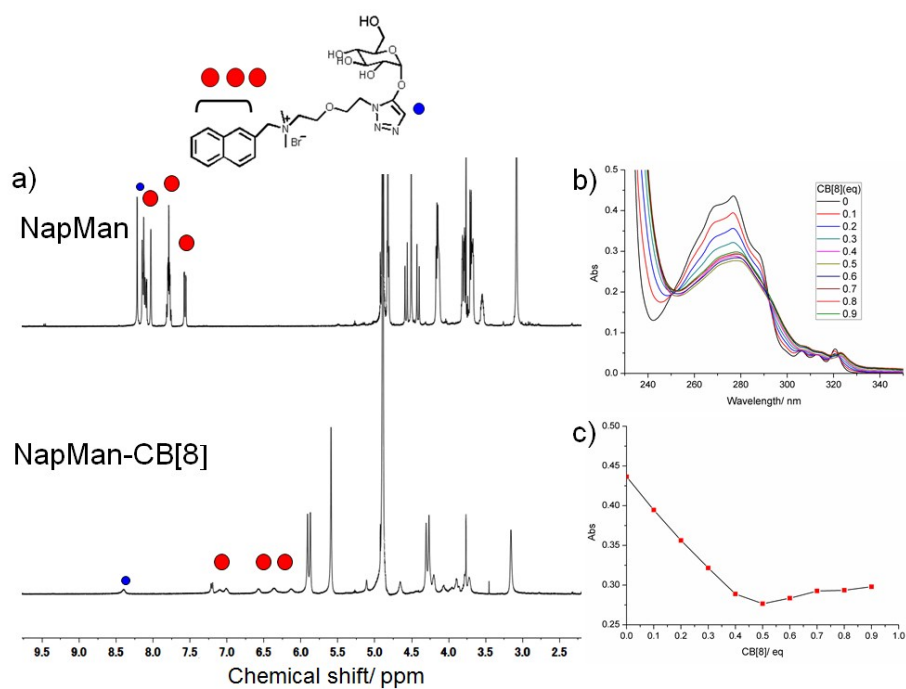

Figure S2. (a)  $^1\text{H}$  NMR spectra of **NapMan** and the mixture of **NapMan**/CB[8] in  $\text{D}_2\text{O}$ .  
 (b) UV-vis spectra of titration of CB[8] into an aqueous solution of **NapMan** (0.1 mM).  
 (c) UV-vis absorbance at 278 nm was plotted against the equivalent of CB[8].

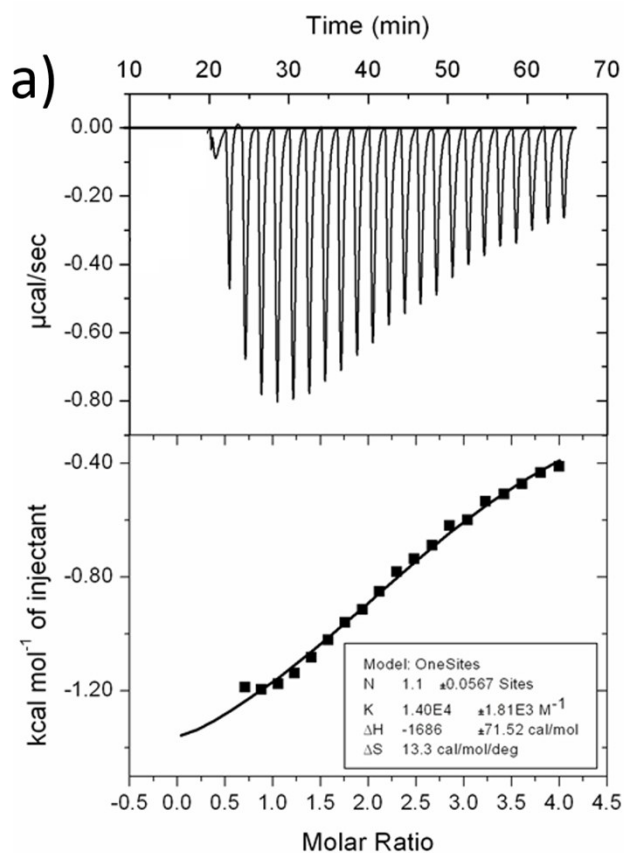

Figure S3. ITC data for the titration of the mixture of CB[8] (0.5 mM) with **NapMan** (1 mM) to ConA (0.05 mM) in aqueous solution at 20°C.

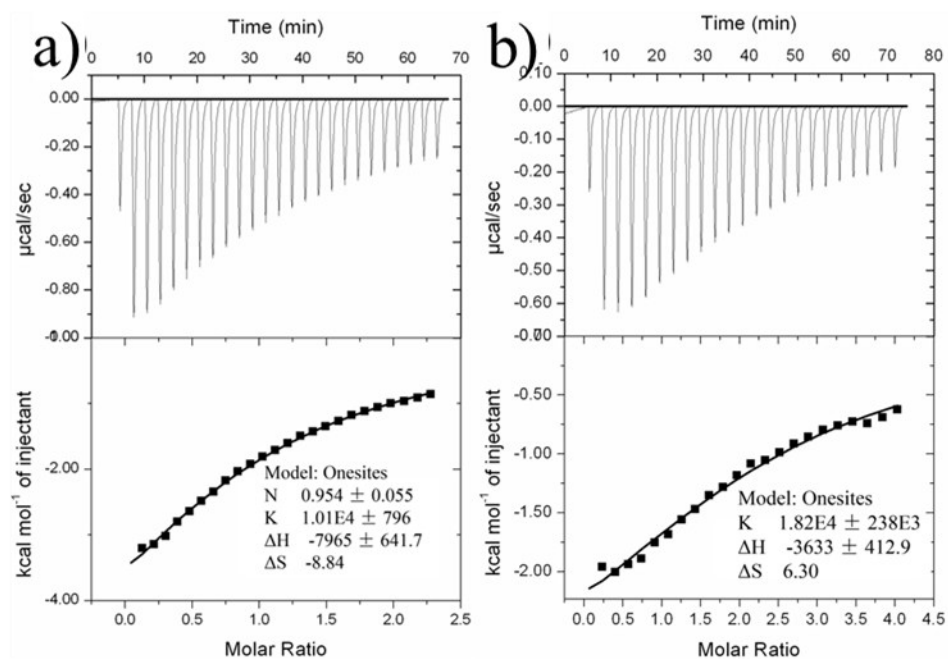

Figure S4. ITC results of raw and integrated data for titration of (a) **AzoMan** (1.0 mM) to ConA (0.08 mM) and (b) mixture of 1.0 mM CB[8] and 0.5 mM **DDPS** to the mixture of 0.05 mM ConA and 0.05 mM **AzoMan** in aqueous solution at 20 °C.

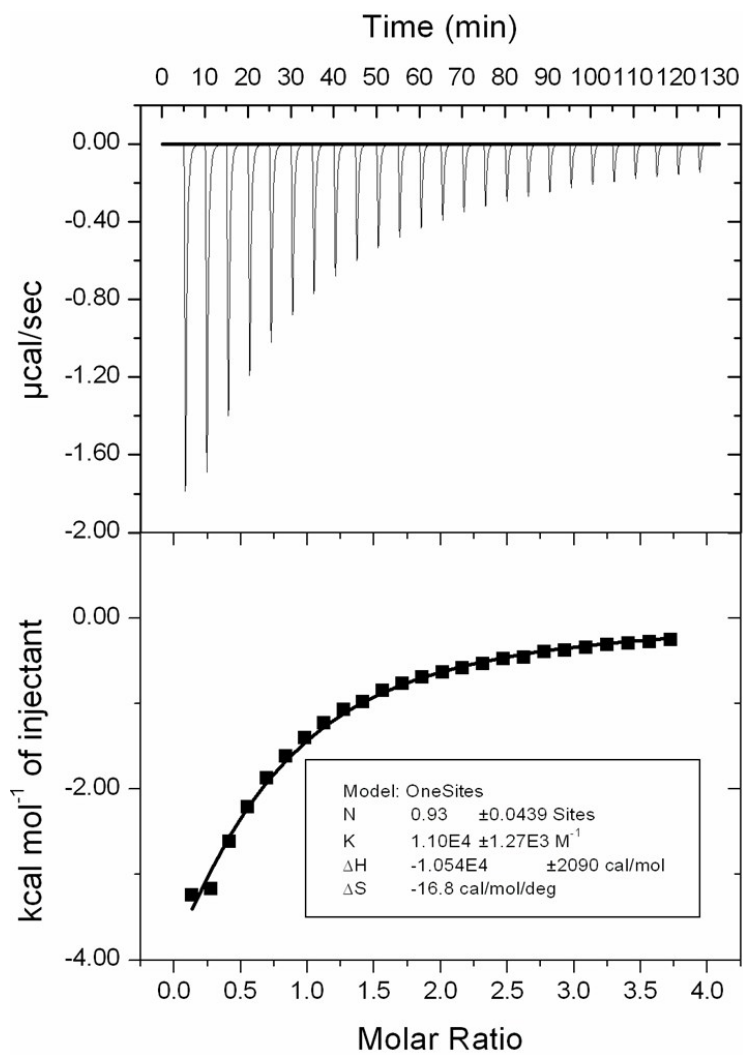

Figure S5. ITC data for the titration of the mixture of CB[8] (1.0 mM) and 0.5 mM DDPS to AzoMan (0.067 mM) in aqueous solution at 20°C.

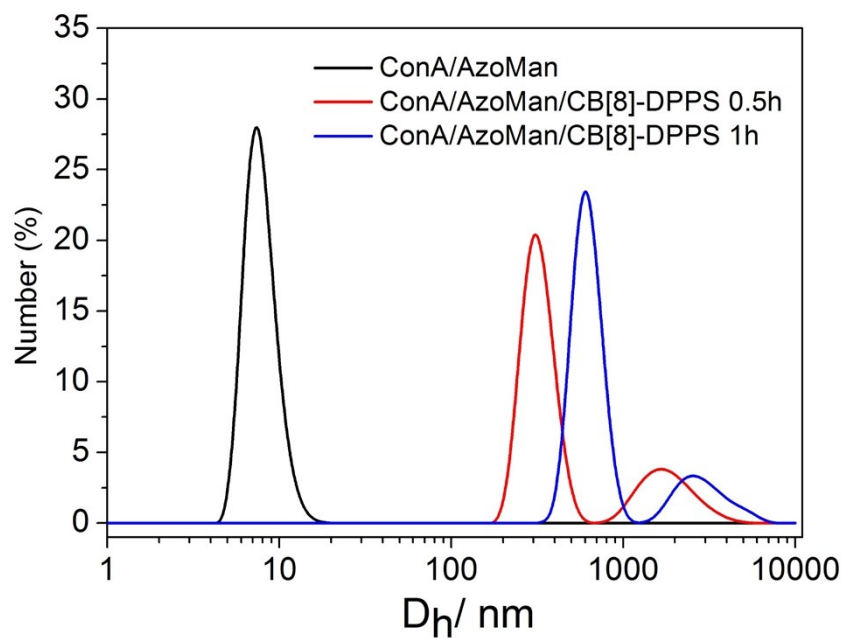

Figure S6. DLS results of ConA(0.2 mM)/AzoMan(0.2 mM) solution after addition of same amount of CB[8]/DDPS at different time interval.

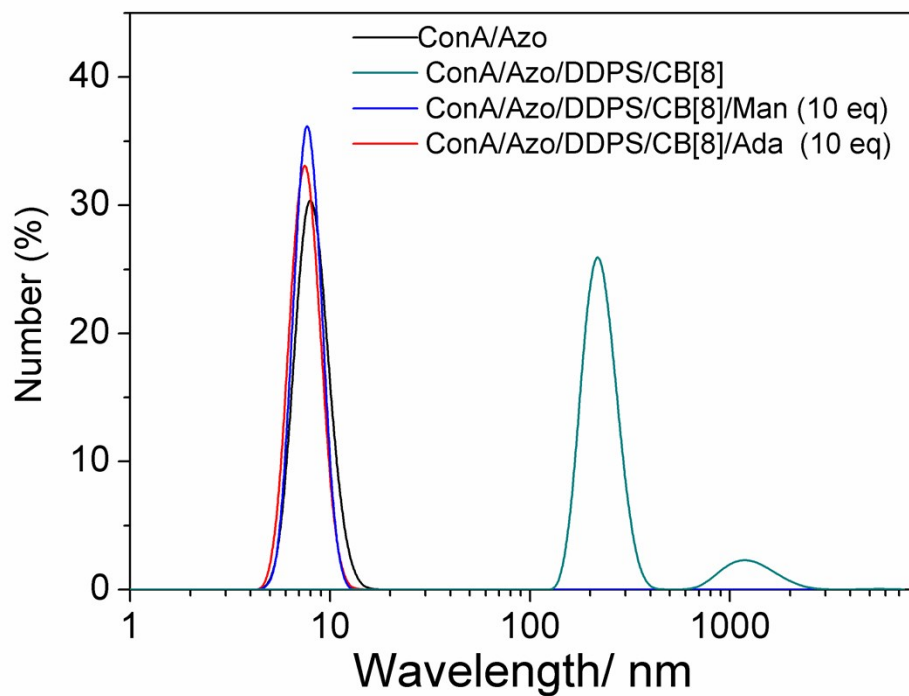



Figure S7. DLS results of ConA (0.2 mM)/**AzoMan** (0.2 mM)/CB[8] (0.2 mM)/DDPS (0.1 mM) assembly solution after the addition of 10 eq free manose or Ada.

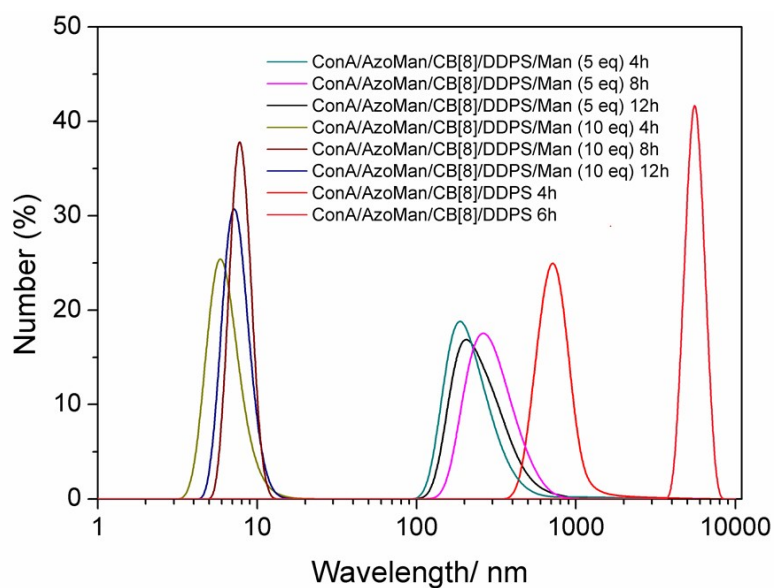

Figure S8. DLS results of ConA(0.2 mM)/**AzoMan**(0.2 mM)/ CB[8] (0.2 mM)/DDPS (0.1 mM) with different amount of free mannose (Man) amount at different time interval.

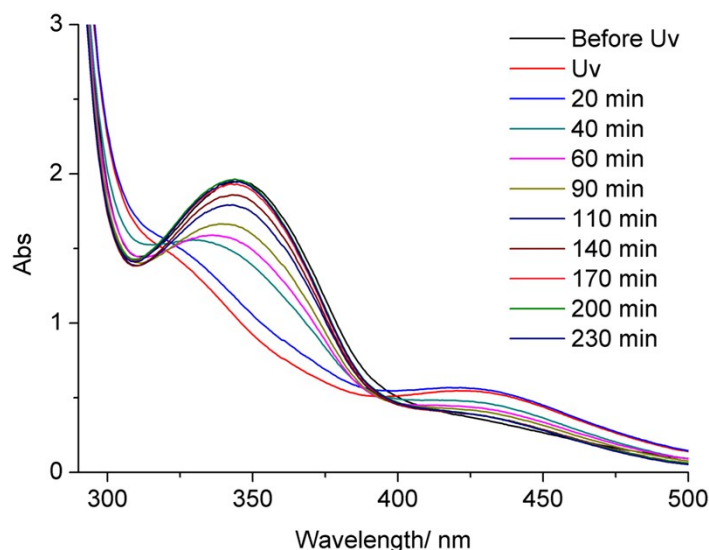

Figure S9. UV-Vis spectra of ConA (0.1 mM)/**AzoMan**/CB[8]/**DDPS** (1:1:1:0.5) before and after 30 min irradiation at 465 nm as well as the time dependent inter-conversion of *cis*- to *trans*-**AzoMan** under ambient light.

## Synthetic procedures and characterizations:

**Synthesis of Nap-OH.** 1 g (4.5 mmol) 2-(Bromomethyl)naphthalene and 0.8 g (6 mmol) 2-[2-(Dimethylamino)ethoxy]ethanol were mixed together in 20 mL acetonitrile and then refluxed at 80 °C under Ar for 24 h. After reaction was finished, the solution was evaporated, then the raw product was purified by column chromatography with MeOH/DCM= 1:20 (v/v) to give compound **1** (1.4 g , 87%) as colourless oil. <sup>1</sup>H NMR (400 MHz, CD<sub>3</sub>OD) δ 8.17 (s, 1H), 7.96-7.94 (t, 2H), 7.90-7.86 (m, 1H), 7.65-7.63 (m, 1H), 7.57-7.51 (m, 2H), 4.82 (s, 1H), 4.00-3.98 (m, 2H), 3.70-3.60 (m, 6H), 3.15 (s, 6H).

**Synthesis of Nap-N<sub>3</sub>.** 1.3 g (3.6 mmol) Nap-OH and 0.73 g (7.2 mmol) triethylamine were dissolved in 30 mL dry DMF and then 0.9 g methylsulfonyl chloride (MsCl) dissolved

in 5 mL dry DMF was added into the above solution in iced water under Ar. The mixture was kept stirring at room temperature for 2 h, then the solvent was removed under rotary evaporator. The oily raw product without further purification was then directly dissolved in 50 mL ethanol/ water ( $v:v = 5:1$ ), and then 1.0 g (15 mmol)  $\text{NaN}_3$  was added. After refluxing about 24 h, the solution was removed by filtration and the solvent was removed by rotary evaporator. The raw product was purified by column chromatography with  $\text{MeOH}/\text{DCM} = 25:1$  ( $v/v$ ) to give colourless oil (0.9 g, 73%).  $^1\text{H}$  NMR (400 MHz,  $\text{CD}_3\text{OD}$ )  $\delta$  8.13 (s, 1H), 7.92-7.85 (m, 3H), 7.6-7.59 (m, 1H), 7.54-7.48 (m, 2H), 4.81 (s, 1H), 3.99-3.98 (t, 2H), 3.68-3.63 (m, 4H), 3.12 (s, 6H).

**Synthesis of NapMan.** 0.25g (0.67 mmol) Nap- $\text{N}_3$ , 0.14 g (0.67 mmol) Alkynyl mannose and 26 mg (0.15 mmol)  $N,N,N',N'',N'''$ -Pentamethyldiethylenetriamine (PMDTA) were added into 5 mL DMF and then after bubbling Ar for 15 min, 11 mg (0.075 mmol) CuBr was added under Ar within 10 min. The mixture was heated to  $35^\circ\text{C}$  overnight. Then the solvent was removed by evaporation and the raw product was purified by column chromatography with  $\text{CH}_3\text{CN}/\text{H}_2\text{O}$  from 10:1 ( $v/v$ ) to 6:1 ( $v/v$ ) to give product (210 mg, 39%) as white solid.  $^1\text{H}$  NMR (400 MHz,  $\text{D}_2\text{O}$ )  $\delta$  8.11 (s, 1H), 8.05-7.99 (m, 3H), 7.93 (s, 1H), 7.70-7.65 (m, 2H), 7.48-7.45 (m, 1H), 4.82-4.81 (d, 1H), 4.72 (s, 2H), 4.49-4.30 (m, 4H), 4.07-4.05 (t, 4H), 3.73-3.66 (m, 3H), 3.61-3.57 (m, 4H), 2.98 (s, 6H).  $^{13}\text{C}$  NMR (400 MHz,  $\text{D}_2\text{O}$ )  $\delta$  165.0, 133.6, 132.5, 129.1, 128.8, 128.0, 127.8, 124.5, 99.4, 72.9, 70.1, 69.9, 68.5, 66.6, 64.4, 63.1, 60.8, 50.6, 50.4, 37.0, 31.4.

**Synthesis of Man-Br.** Man-Br was synthesised according to the literature.<sup>1</sup> D-mannose was dried under vacuum at  $50^\circ\text{C}$  before use. The dried D-mannose 3.6 g (20 mmol) and 0.4 g  $\text{SiO}_2 \cdot \text{H}_2\text{SO}_4$  were mixed together and then heated to  $60^\circ\text{C}$  overnight under Ar.

Finally the raw product was purified by column chromatography with DCM/CH<sub>3</sub>OH = 6:1 (v/v) to give light yellow oil (2.7g, 47%). <sup>1</sup>H NMR (400 MHz, CD<sub>3</sub>OD) δ 4.96-4.94 (d, 1H), 4.07-4.03 (m, 1H), 4.01-3.98 (m, 1H), 3.96-3.88 (m, 2H), 3.87-3.83 (m, 2H), 3.69-3.64 (m, 3H). <sup>13</sup>C NMR (400 MHz, D<sub>2</sub>O) 99.7, 73.0, 70.5, 69.9, 67.6, 66.7, 61.1, 31.3.

DDPS, CB[8] and Alkynyl mannose were synthesized in our previous literature<sup>2,3</sup>.

Figure S10.  $^1\text{H}$  NMR of **NapMan** in  $\text{CD}_3\text{OD}$ .

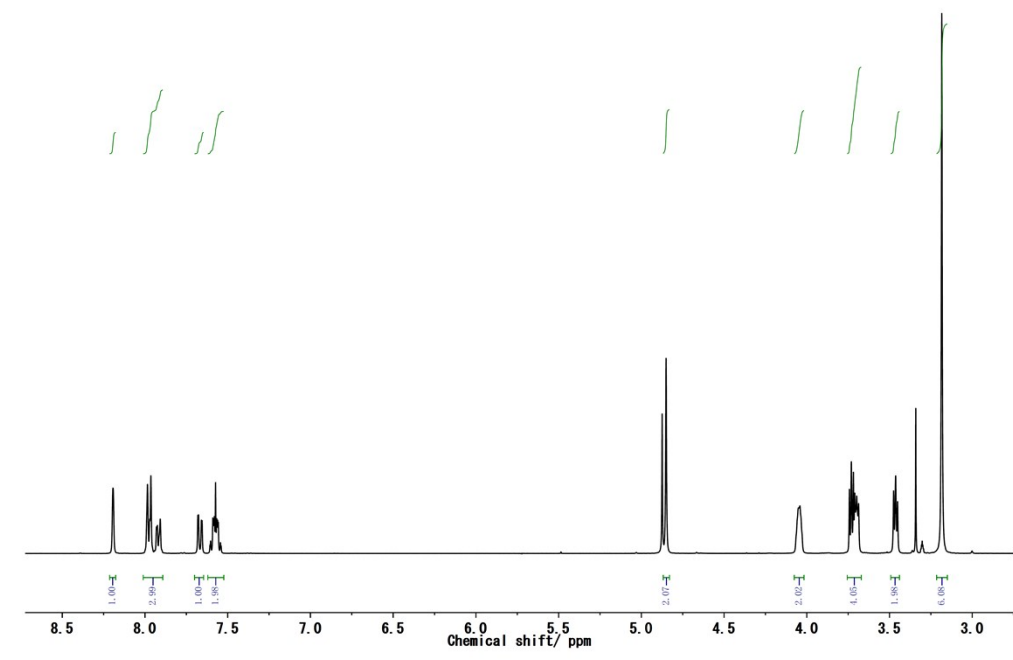

Figure S11.  $^1\text{H}$  NMR of **NapMan** in  $\text{CD}_3\text{OD}$ .

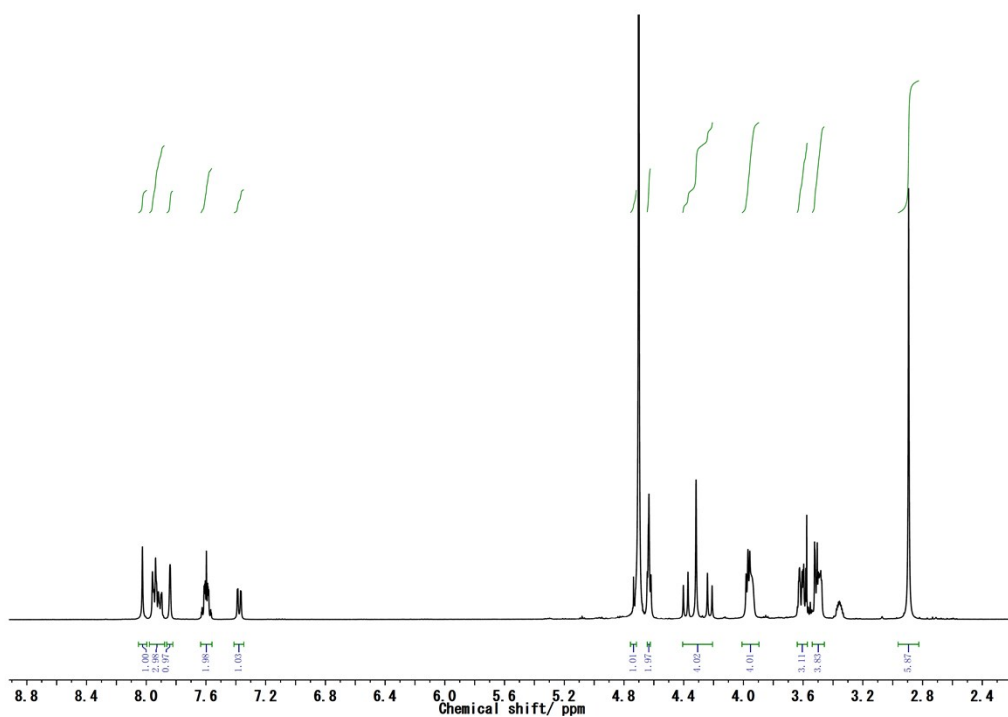

Figure S12.  $^1\text{H}$  NMR of NapMan in  $\text{D}_2\text{O}$ .

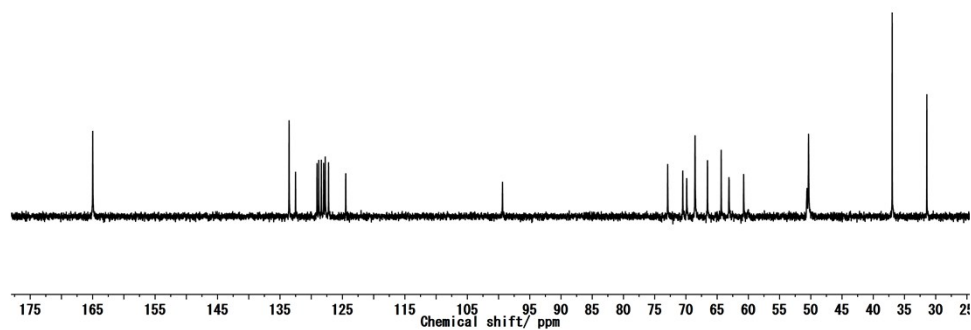

Figure S13.  $^{13}\text{C}$  NMR of **NapMan** in  $\text{D}_2\text{O}$ .

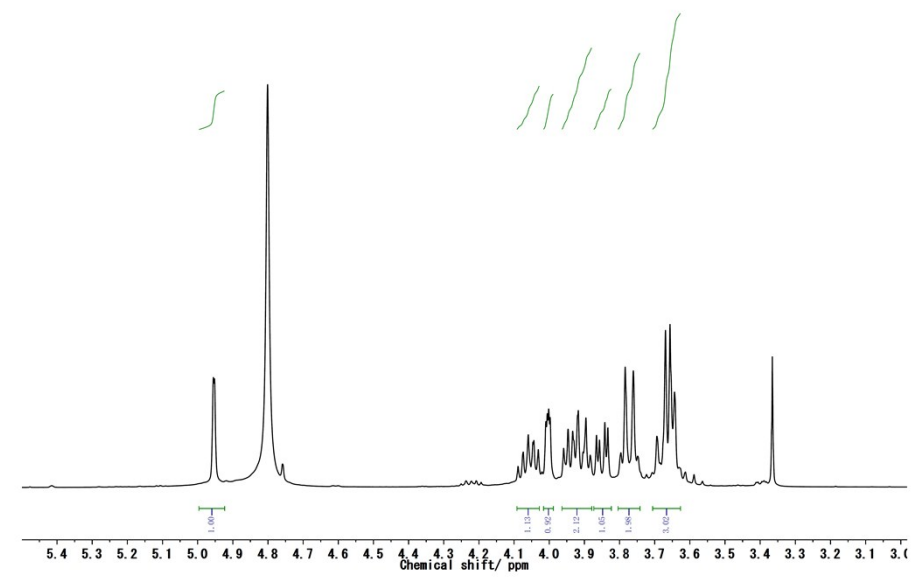

Figure S14.  $^1\text{H}$  NMR of Man-Br in  $\text{CD}_3\text{OD}$ .

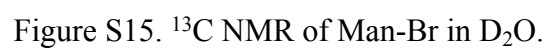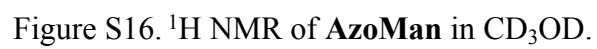

## Reference

- 1 J. Geng, F. Biedermann, J. M. Zayed, F. Tian and O. A. Scherman, *Macromolecules*, 2011, **44**, 4276.
- 2 Z. Ji, J. Liu, G. Chen and M. Jiang, *Polym. Chem.*, 2014, **5**, 2709.
- 3 F. Sakai, G. Yang, M. S. Weiss, Y. Liu, G. Chen and M. Jiang, *Nat. Commun.*, 2014, **5**, 4634
